# Supplementary material for: A switching cascade of hydrazone-based rotary switches through coordination-coupled proton relays
Source: Springer Nature journal article supplement (doi:10.1038/nchem.1408), 2012-07-26
Supplement: 41557_2012_BFnchem1408_MOESM10_ESM.mol [file 41557_2012_BFnchem1408_MOESM10_ESM.mol]

  ChemDraw07121207582D

 25 27  0  0  0  0  0  0  0  0999 V2000
   -2.8444   -1.5040    0.0000 C   0  0  0  0  0  0  0  0  0  0  0  0
   -2.8444   -2.3290    0.0000 C   0  0  0  0  0  0  0  0  0  0  0  0
   -2.1300   -2.7415    0.0000 C   0  0  0  0  0  0  0  0  0  0  0  0
   -1.4155   -2.3290    0.0000 C   0  0  0  0  0  0  0  0  0  0  0  0
   -1.4155   -1.5040    0.0000 C   0  0  0  0  0  0  0  0  0  0  0  0
   -2.1300   -1.0915    0.0000 N   0  0  0  0  0  0  0  0  0  0  0  0
   -0.7010   -2.7415    0.0000 C   0  0  0  0  0  0  0  0  0  0  0  0
    0.0135   -2.3290    0.0000 C   0  0  0  0  0  0  0  0  0  0  0  0
    0.0135   -1.5040    0.0000 C   0  0  0  0  0  0  0  0  0  0  0  0
   -0.7010   -1.0915    0.0000 C   0  0  0  0  0  0  0  0  0  0  0  0
   -0.7010   -0.2693    0.0000 N   0  0  0  0  0  0  0  0  0  0  0  0
   -1.4775    0.1418    0.0000 H   0  0  0  0  0  0  0  0  0  0  0  0
    0.0110    0.1418    0.0000 N   0  0  0  0  0  0  0  0  0  0  0  0
    0.0110    0.9612    0.0000 C   0  0  0  0  0  0  0  0  0  0  0  0
    0.7206    1.3709    0.0000 C   0  0  0  0  0  0  0  0  0  0  0  0
   -0.6985    1.3709    0.0000 C   0  0  0  0  0  0  0  0  0  0  0  0
   -0.7848    2.1913    0.0000 N   0  0  0  0  0  0  0  0  0  0  0  0
   -1.5917    2.3629    0.0000 C   0  0  0  0  0  0  0  0  0  0  0  0
   -2.0042    1.6484    0.0000 C   0  0  0  0  0  0  0  0  0  0  0  0
   -1.4522    1.0353    0.0000 N   0  0  0  0  0  0  0  0  0  0  0  0
    1.4302    0.9612    0.0000 O   0  0  0  0  0  0  0  0  0  0  0  0
    0.7206    2.1902    0.0000 O   0  0  0  0  0  0  0  0  0  0  0  0
    2.1373    1.3694    0.0000 C   0  0  0  0  0  0  0  0  0  0  0  0
    2.8444    0.9612    0.0000 C   0  0  0  0  0  0  0  0  0  0  0  0
   -0.1737    2.7415    0.0000 C   0  0  0  0  0  0  0  0  0  0  0  0
  1  2  2  0      
  2  3  1  0      
  3  4  2  0      
  4  5  1  0      
  5  6  2  0      
  6  1  1  0      
  4  7  1  0      
  7  8  2  0      
  8  9  1  0      
  9 10  2  0      
 10  5  1  0      
 10 11  1  0      
 11 12  1  0      
 11 13  1  0      
 13 14  2  0      
 14 15  1  0      
 14 16  1  0      
 16 17  1  0      
 17 18  1  0      
 18 19  2  0      
 19 20  1  0      
 20 16  2  0      
 15 21  1  0      
 15 22  2  0      
 21 23  1  0      
 23 24  1  0      
 17 25  1  0      
M  END
